# Supplementary material
Source: ML conference proceedings conference paper supplement (https://openreview.net/forum?id=cLQlsOGqbM)

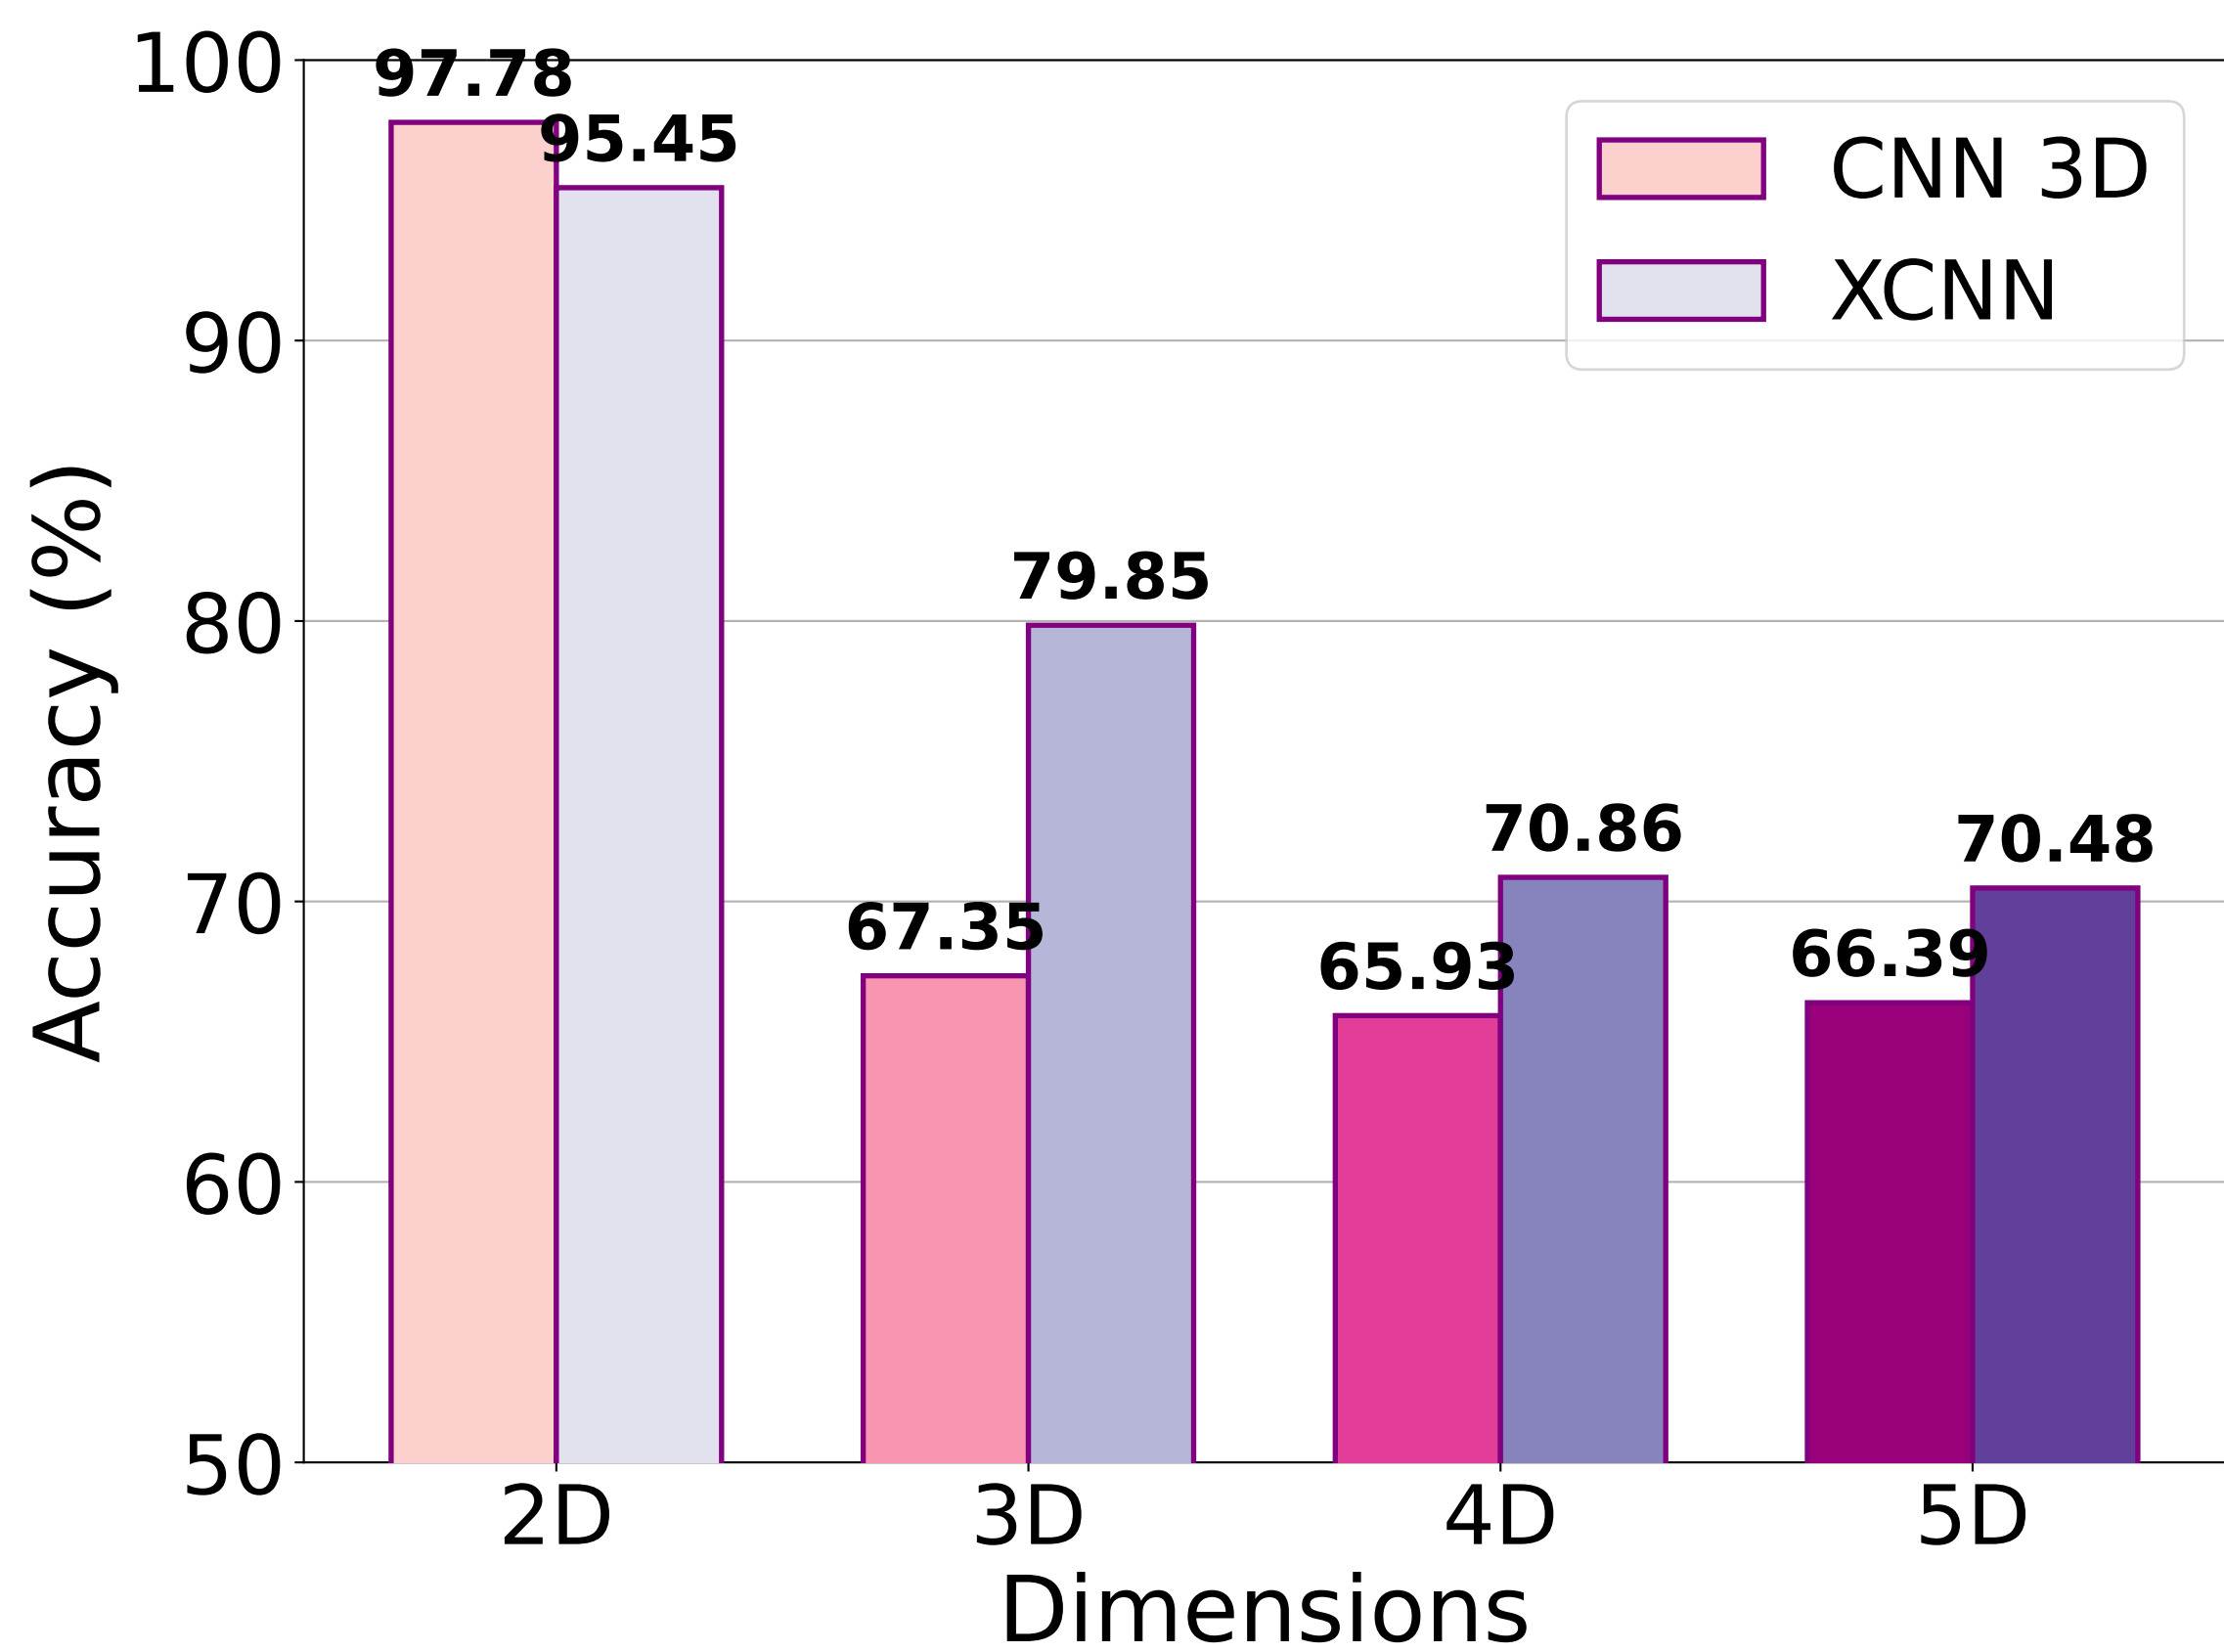

Supplement: supplementary_material [file toy.pdf › 19978_Axial_Neural_Networks_fo_Supplementary Material/Code/xmpp_submitted/plots/toy.pdf]

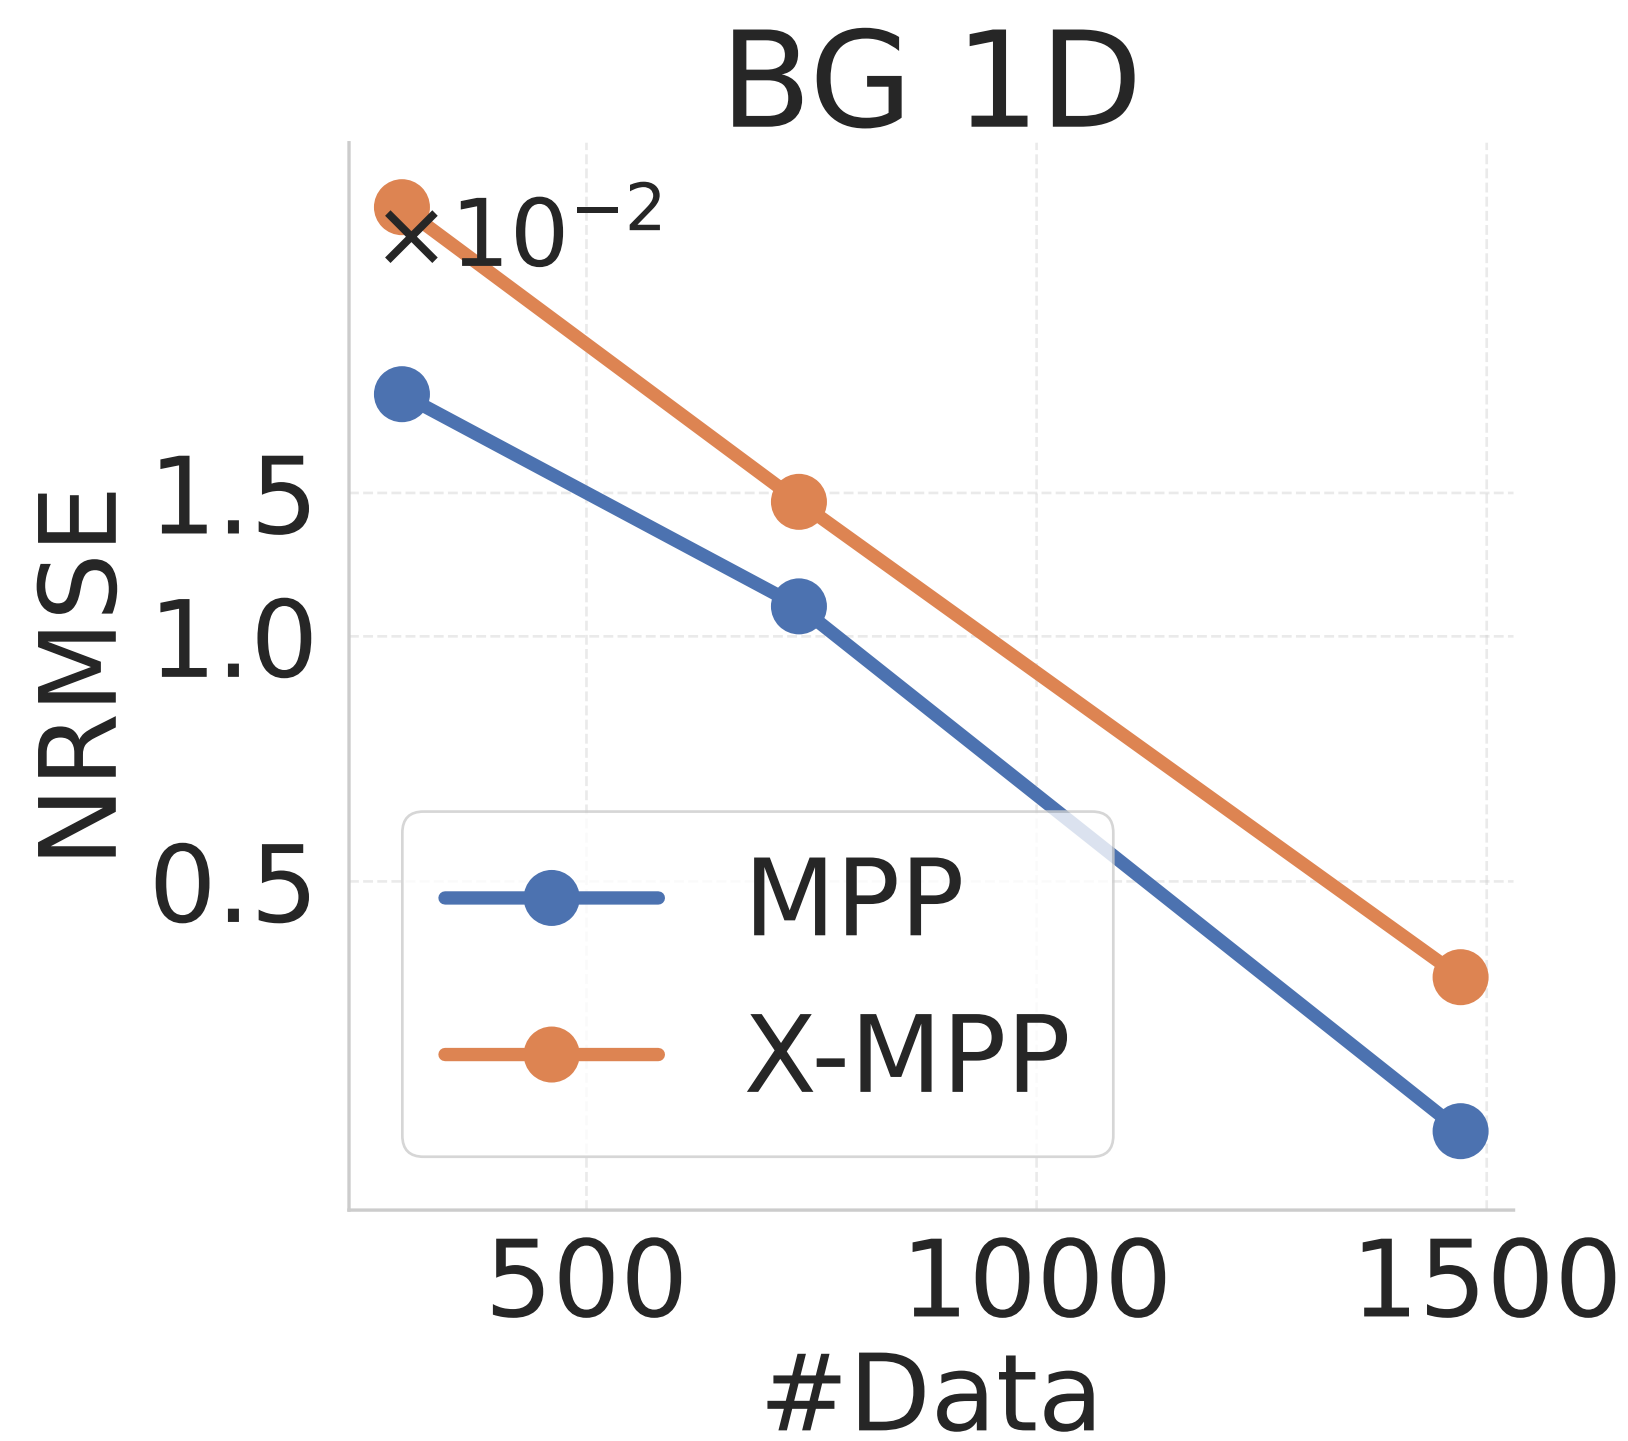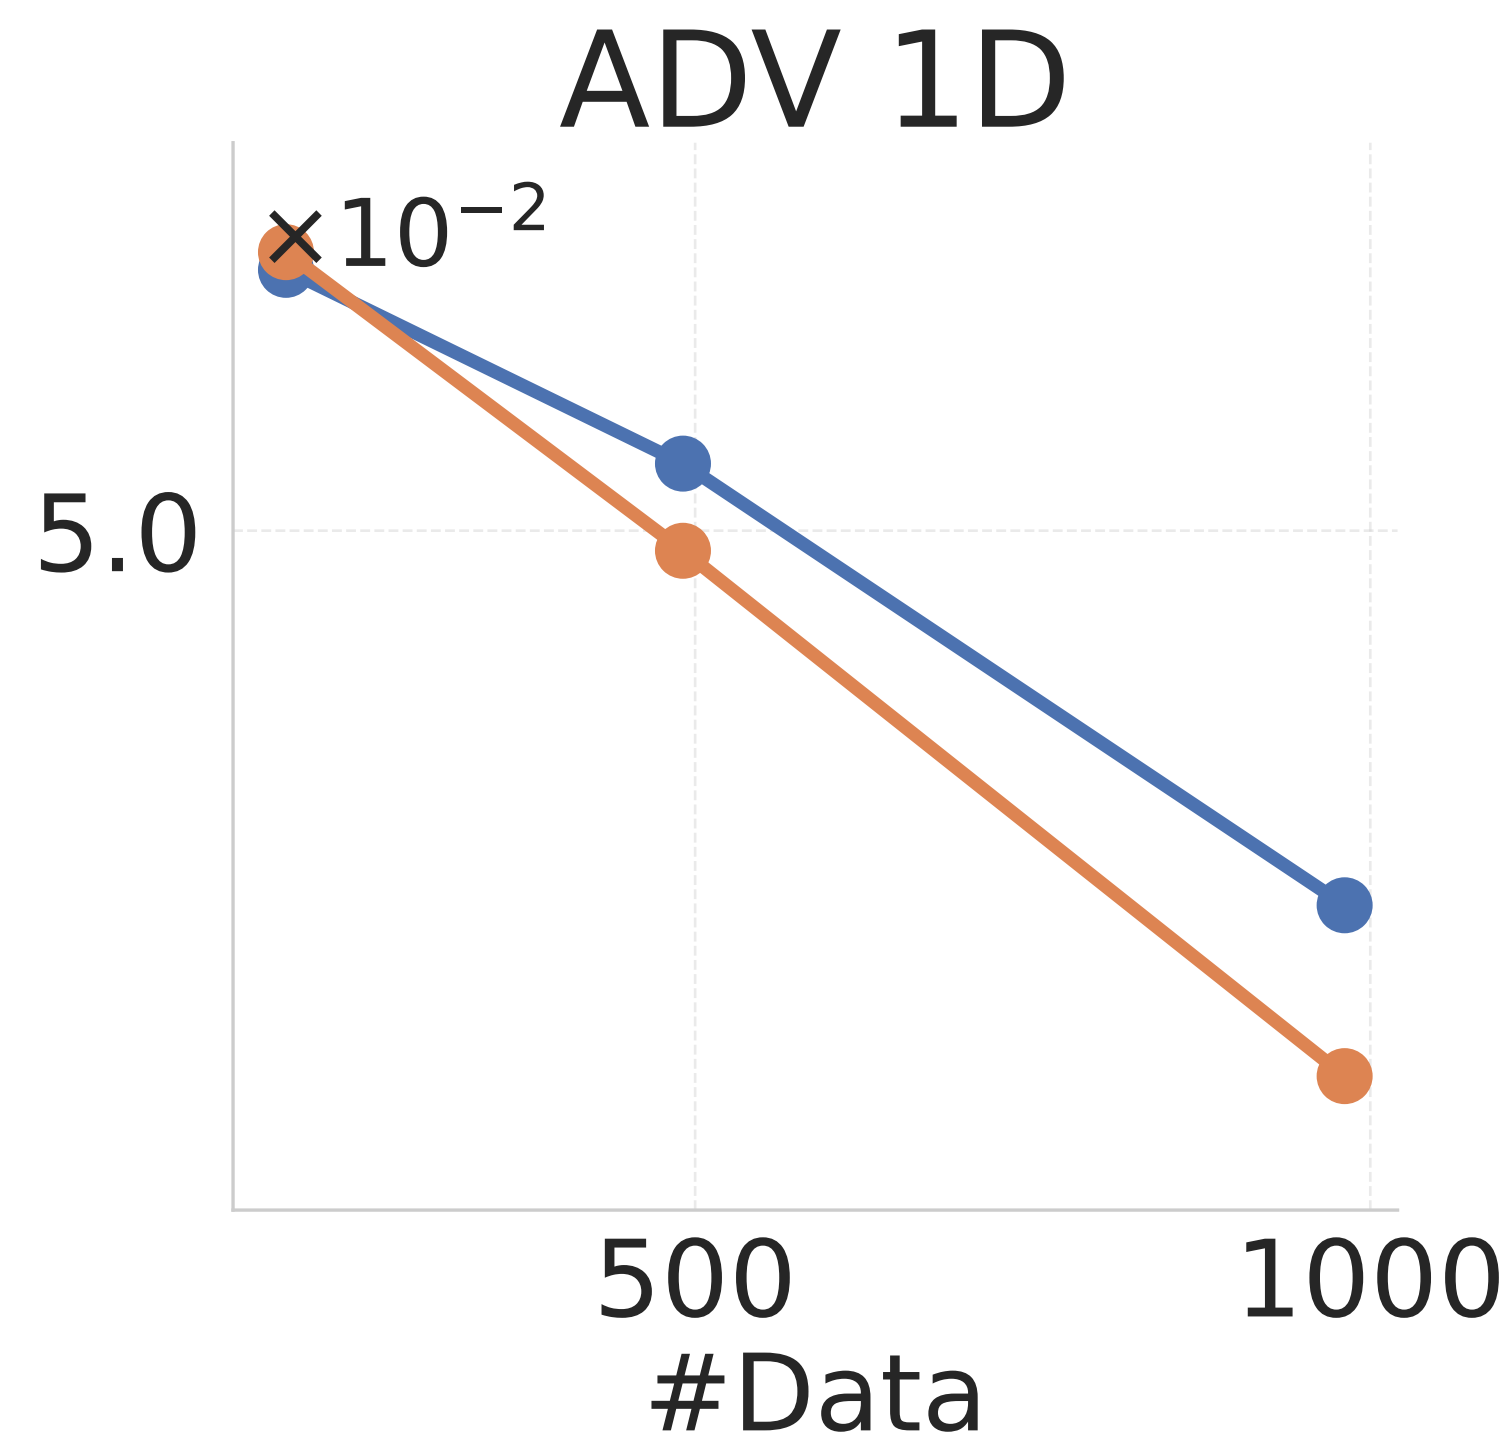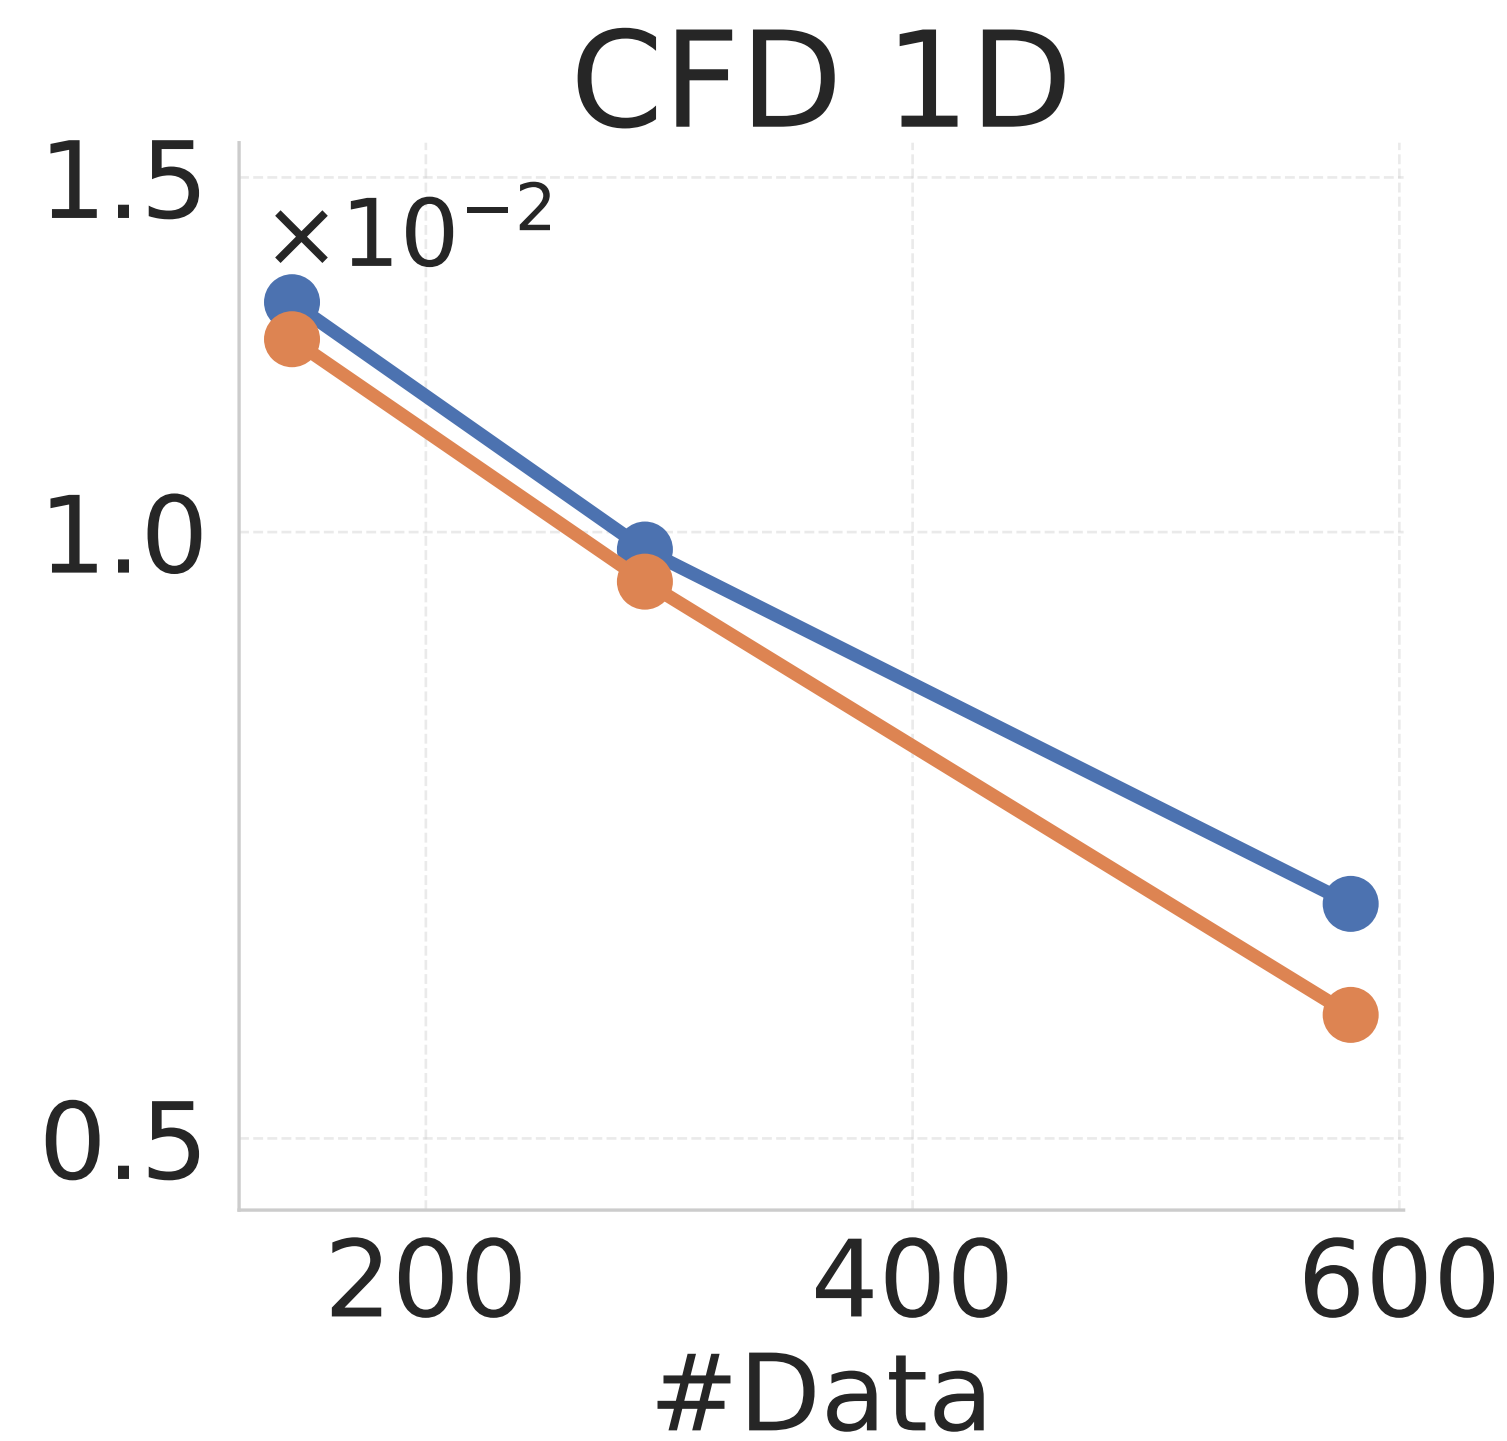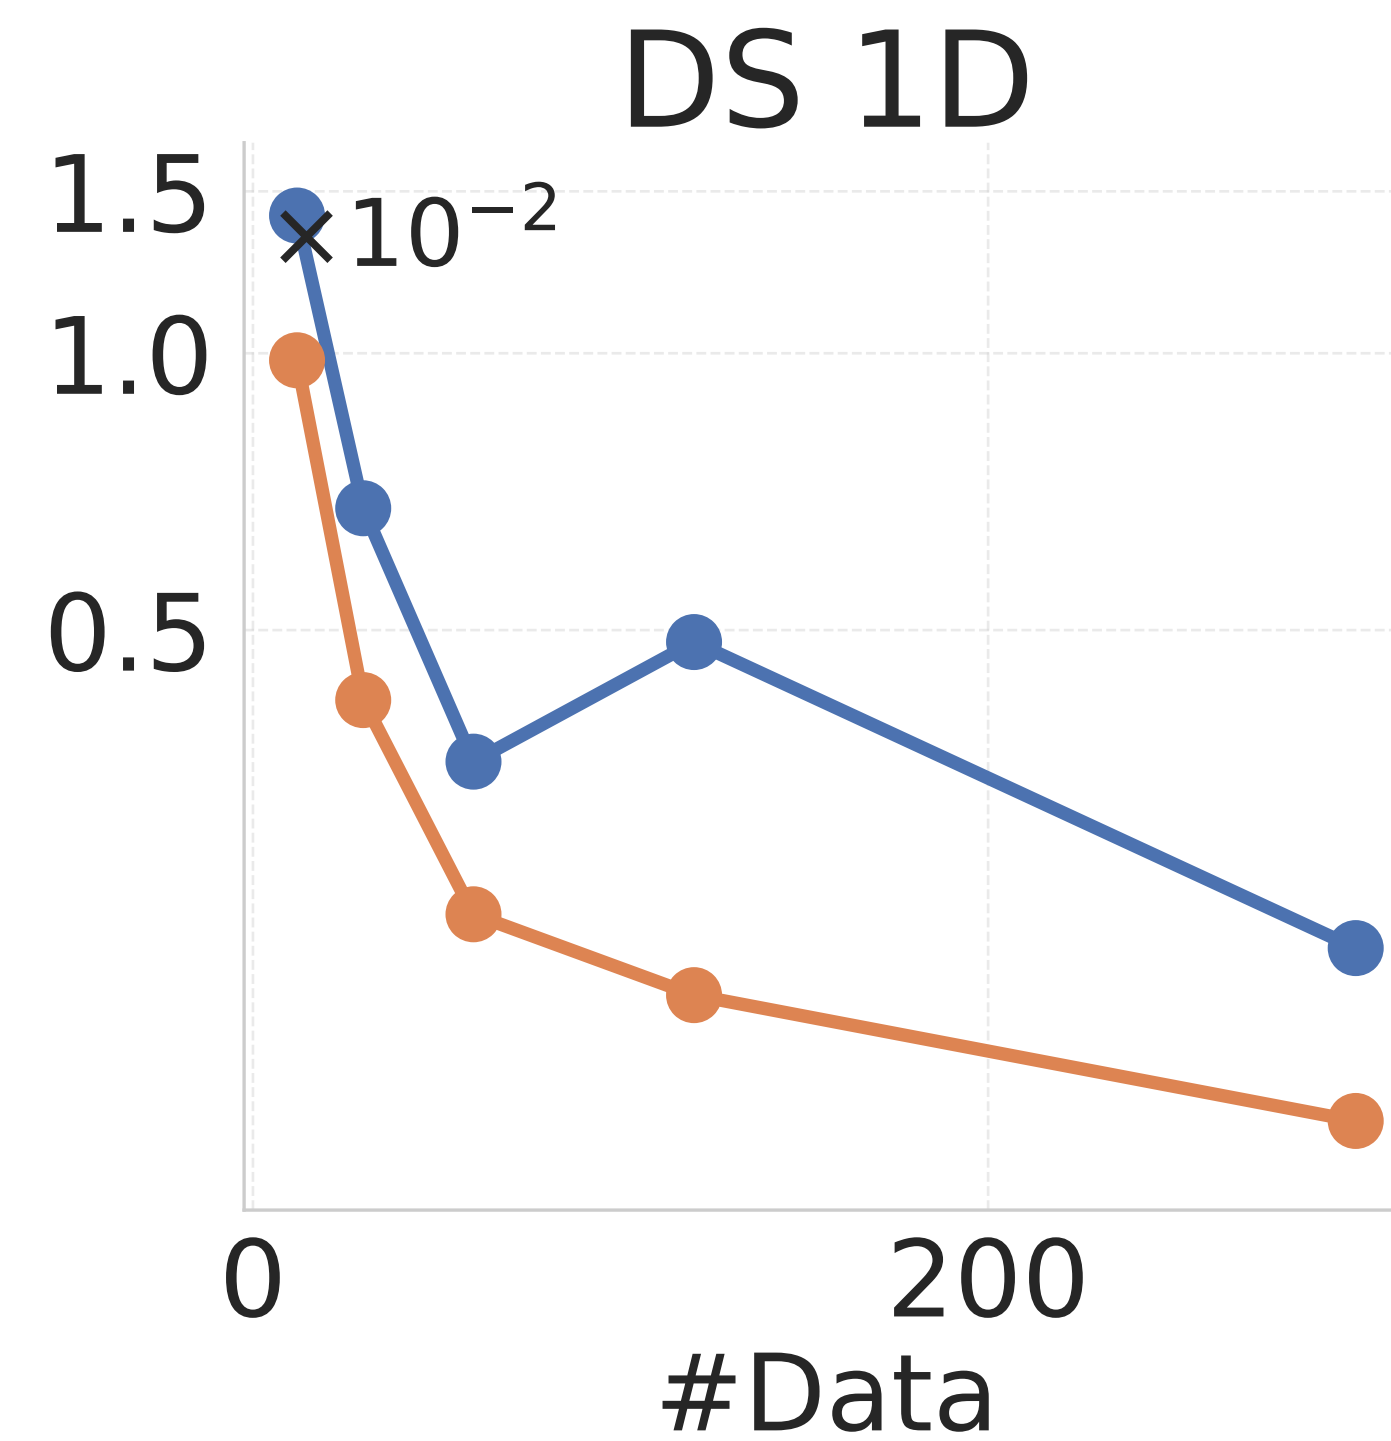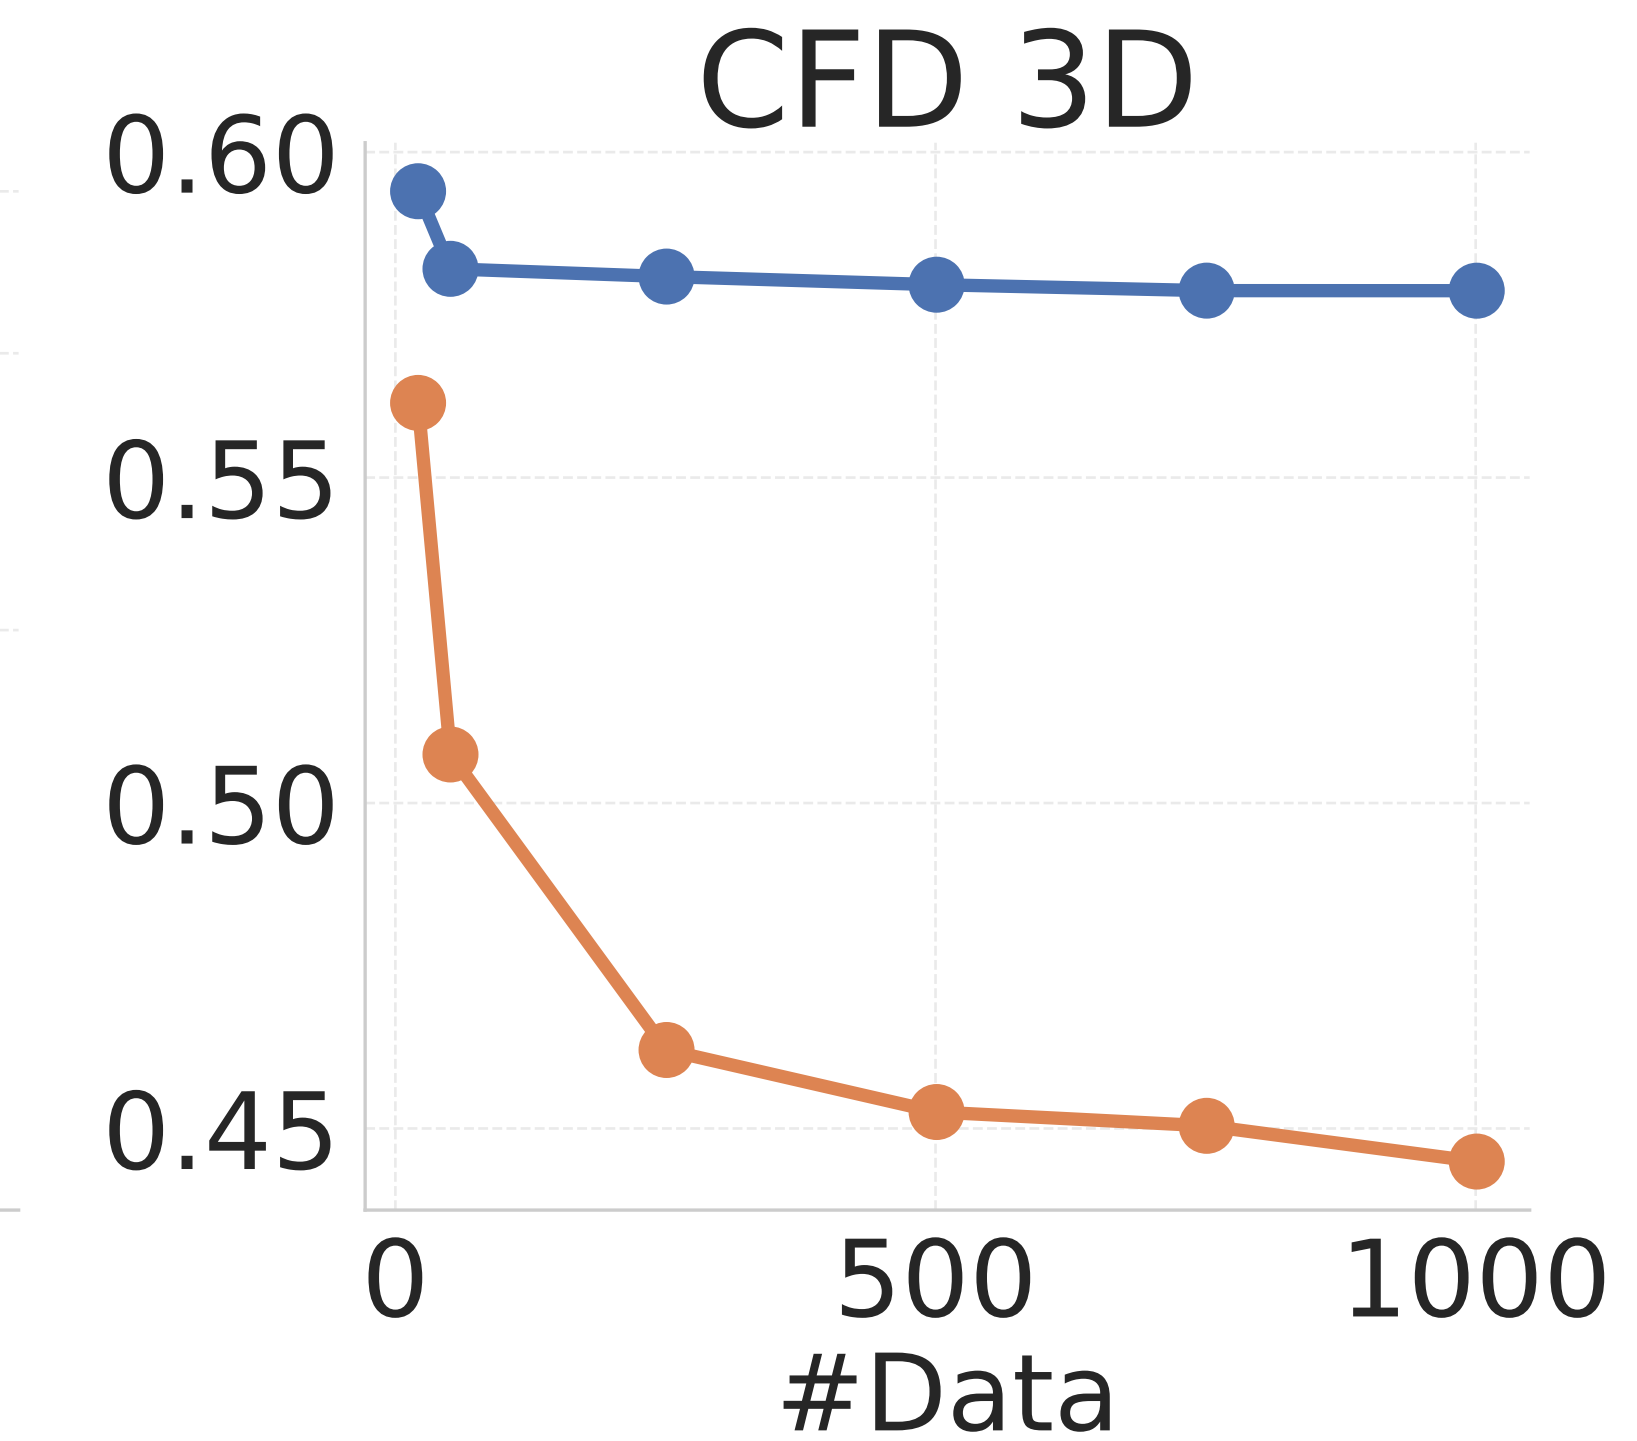

Supplement: supplementary_material [file unseen.pdf › 19978_Axial_Neural_Networks_fo_Supplementary Material/Code/xmpp_submitted/plots/unseen.pdf]
